# Supplementary material for: Treatment, Outcome, and Relapse of Spontaneous and Nonspontaneous Cerebrospinal Fluid Leak
Source: MDPI journal article supplement (doi:10.3390/brainsci12030340), 2022-03-02
Supplement: s1 [file s1]

## Supplementary Materials

Table S1. Demographic data of spontaneous and non-spontaneous CSF leak.

|                  | Spontaneous | Non-spontaneous | <i>p</i> -value |
|------------------|-------------|-----------------|-----------------|
| Patient number   | 20          | 61              |                 |
| Height (cm)      | 164±66      | 165±63          | 0.36            |
| Body weight (kg) | 64.4±13.1   | 65.7±13.3       | 0.36            |
| BMI              | 23.8±11.6   | 24.2±23.1       | 0.33            |

Table S2. Detailed results of Fisher's exact test on binominal data of Table 2

Head : rhinorrhea

|                    | Sphenoid surgery | Spine surgery | Skull base surgery | Calvarial surgery | Lumbar puncture | Trauma       |
|--------------------|------------------|---------------|--------------------|-------------------|-----------------|--------------|
| Sphenoid surgery   | -                | <b>0.0011</b> | 0.6244             | 0.4118            | <b>0.0075</b>   | 0.6924       |
| Spine surgery      | -                | -             | <b>0.0027</b>      | 1                 | 1               | <b>0.001</b> |
| Skull base surgery | -                | -             | -                  | 0.333             | <b>0.010</b>    | 1            |
| Calvarial surgery  | -                | -             | -                  | -                 | 1               | 0.333        |
| Lumbar             | -                | -             | -                  | -                 | -               | <b>0.004</b> |

|          |   |   |   |   |   |   |
|----------|---|---|---|---|---|---|
| puncture |   |   |   |   |   |   |
| Trauma   | - | - | - | - | - | - |

#### Meningitis

|                    | Sphenoid surgery | Spine surgery | Skull base surgery | Calvarial surgery | Lumbar puncture | Trauma |
|--------------------|------------------|---------------|--------------------|-------------------|-----------------|--------|
| Sphenoid surgery   | -                | <b>0.0157</b> | 1                  | 1                 | 0.2719          | 0.6618 |
| Spine surgery      | -                | -             | 0.0543             | 0.1429            | 1               | 0.1355 |
| Skull base surgery | -                | -             | -                  | 1                 | 0.1923          | 0.584  |
| Calvarial surgery  | -                | -             | -                  | -                 | 0.3             | 1      |
| Lumbar puncture    | -                | -             | -                  | -                 | -               | 0.4967 |
| Trauma             | -                | -             | -                  | -                 | -               | -      |

#### Conservative

|                  | Sphenoid surgery | Spine surgery | Skull base surgery | Calvarial surgery | Lumbar puncture | Trauma |
|------------------|------------------|---------------|--------------------|-------------------|-----------------|--------|
| Sphenoid surgery | -                | 0.2966        | 1                  | 1                 | 0.0657          | 1      |

|                    |   |   |        |   |        |               |
|--------------------|---|---|--------|---|--------|---------------|
| Spine surgery      | - | - | 0.3509 | 1 | 0.3783 | 0.2344        |
| Skull base surgery | - | - | -      | 1 | 0.1026 | 1             |
| Calvarial surgery  | - | - | -      | - | 0.5    | 1             |
| Lumbar puncture    | - | - | -      | - | -      | <b>0.0491</b> |
| Trauma             | - | - | -      | - | -      | -             |

#### Surgery

|                    | Sphenoid surgery | Spine surgery | Skull base surgery | Calvarial surgery | Lumbar puncture | Trauma        |
|--------------------|------------------|---------------|--------------------|-------------------|-----------------|---------------|
| Sphenoid surgery   | -                | 0.2966        | 1                  | 1                 | <b>0.0013</b>   | 1             |
| Spine surgery      | -                | -             | 0.3509             | 1                 | <b>0.0202</b>   | 0.2344        |
| Skull base surgery | -                | -             | -                  | 1                 | <b>0.0047</b>   | 1             |
| Calvarial surgery  | -                | -             | -                  | -                 | 0.0667          | 1             |
| Lumbar puncture    | -                | -             | -                  | -                 | -               | <b>0.0023</b> |
| Trauma             | -                | -             | -                  | -                 | -               | -             |

### Blood patch

|                    | Sphenoid surgery | Spine surgery | Skull base surgery | Calvarial surgery | Lumbar puncture | Trauma |
|--------------------|------------------|---------------|--------------------|-------------------|-----------------|--------|
| Sphenoid surgery   | -                | 1             | 1                  | 1                 | 0.083           | 1      |
| Spine surgery      | -                | -             | 1                  | 1                 | <b>0.007</b>    | 1      |
| Skull base surgery | -                | -             | -                  | 1                 | 0.4615          | 1      |
| Calvarial surgery  | -                | -             | -                  | -                 | 1               | 1      |
| Lumbar puncture    | -                | -             | -                  | -                 | -               | 0.1373 |
| Trauma             | -                | -             | -                  | -                 | -               | -      |

### MRI with CSF accumulation

|                  | Sphenoid surgery | Spine surgery | Skull base surgery | Calvarial surgery | Lumbar puncture | Trauma        |
|------------------|------------------|---------------|--------------------|-------------------|-----------------|---------------|
| Sphenoid surgery | -                | <b>0.0122</b> | 0.1328             | 0.517             | 0.1243          | 0.4517        |
| Spine surgery    | -                | -             | <b>0.0006</b>      | <b>0.015</b>      | <b>0.0002</b>   | 0.1975        |
| Skull base       | -                | -             | -                  | 1                 | 1               | <b>0.0427</b> |

|                   |   |   |   |   |   |               |
|-------------------|---|---|---|---|---|---------------|
| surgery           |   |   |   |   |   |               |
| Calvarial surgery | - | - | - | - | 1 | 0.2088        |
| Lumbar puncture   | - | - | - | - | - | <b>0.0377</b> |
| Trauma            | - | - | - | - | - | -             |

#### Recurrence

|                    | Sphenoid surgery | Spine surgery | Skull base surgery | Calvarial surgery | Lumbar puncture | Trauma |
|--------------------|------------------|---------------|--------------------|-------------------|-----------------|--------|
| Sphenoid surgery   | -                | 0.4479        | 0.5325             | 1                 | 0.5257          | 0.3919 |
| Spine surgery      | -                | -             | 0.277              | 0.5263            | 0.1372          | 1      |
| Skull base surgery | -                | -             | -                  | 1                 | 1               | 0.2374 |
| Calvarial surgery  | -                | -             | -                  | -                 | 1               | 0.5055 |
| Lumbar puncture    | -                | -             | -                  | -                 | -               | 0.119  |
| Trauma             | -                | -             | -                  | -                 | -               | -      |
